# Supplementary material for: Self-assembled zirconia nanotube arrays: fabrication mechanism, energy consideration and optical activity
Source: Royal Society of Chemistry journal article supplement (doi:10.1039/c4ra05115g), 2014-01-01
Supplement: c4ra05115g1.pdf [file c4ra05115g1.pdf]

## Supporting Information

### Self-assembled Zirconia Nanotube Arrays: Fabrication Mechanism, Energy Consideration and Optical Activity

Ahmad W. Amer<sup>a</sup>, Seifallah M. Mohamed<sup>a</sup>, Ahmed M. Hafez<sup>a</sup>, Siham Y. Alqaradawi<sup>b</sup>,  
Amina S. Aljaber<sup>b</sup> and Nageh K. Allam<sup>a,\*</sup>

<sup>a</sup>Energy Materials Laboratory (EML), Physics Department, School of Sciences and Engineering, The American University in Cairo, New Cairo 11835, Egypt; E-mail: nageh.allam@aucegypt.edu

<sup>b</sup>Department of Chemistry and Earth Sciences, Qatar University, P. O. Box 110003, Doha, Qatar.

#### Effect of Solvent Composition:

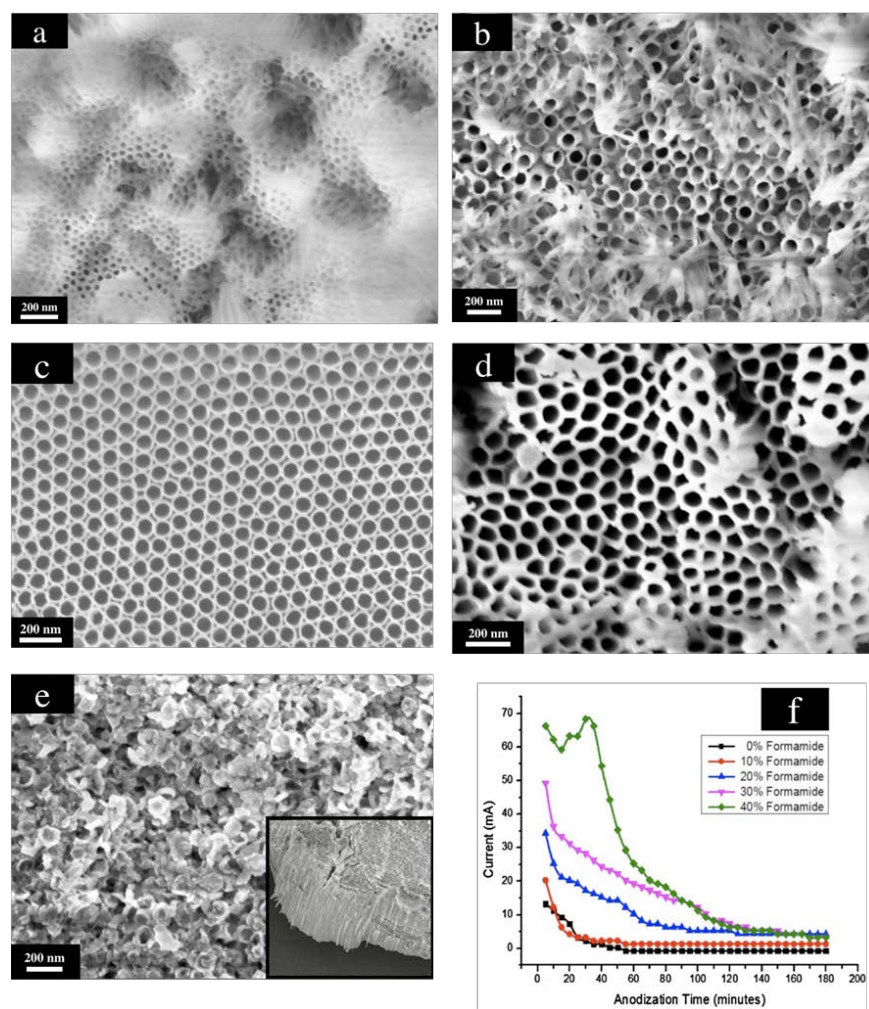

**Figure S1.** FESEM images of as-grown ZrO<sub>2</sub> nanotube arrays via anodic oxidation for 3hrs @50V in glycerol electrolytes containing 4wt% H<sub>2</sub>O and 1wt% NH<sub>4</sub>F, along with (a) 0% FA, (b) 10% FA, (c) 20% FA, (d) 30% FA, and (e) 40% FA. Panel (f) shows the time-dependant anodization current curves for different electrolyte compositions.

### Effect of Fluoride and Water Contents:

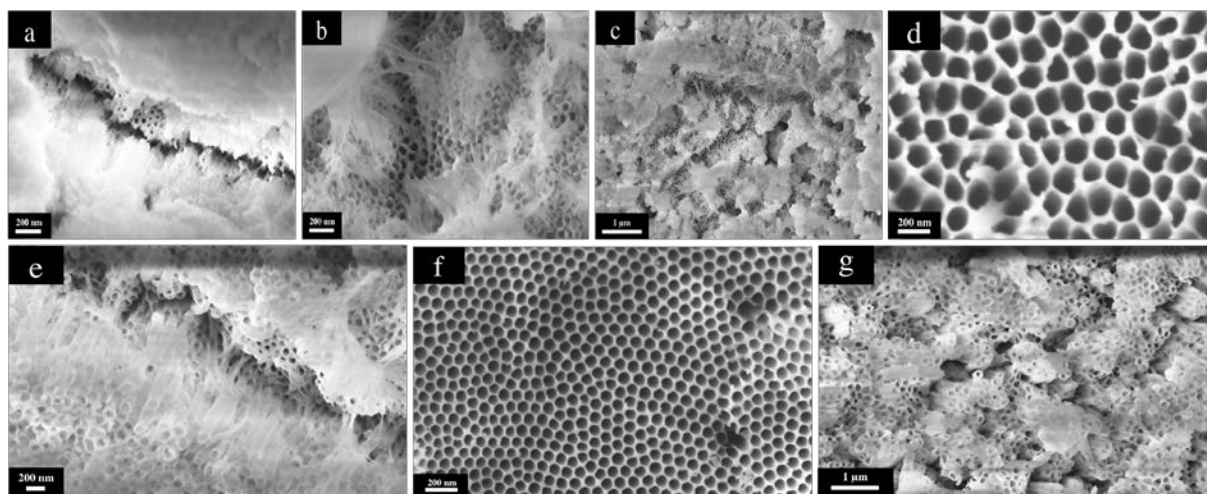

**Figure S2.** FESEM images of as-grown  $\text{ZrO}_2$  nanotube arrays via anodic oxidation for 3hrs @50V in glycerol electrolytes containing 20% FA, along with (a) 0.5wt%  $\text{NH}_4\text{F}$  and 2wt%  $\text{H}_2\text{O}$ , (b) 0.5wt%  $\text{NH}_4\text{F}$  and 3wt%  $\text{H}_2\text{O}$ , (c) 0.5wt%  $\text{NH}_4\text{F}$  and 4wt%  $\text{H}_2\text{O}$ , (d) 1wt%  $\text{NH}_4\text{F}$  and 2wt%  $\text{H}_2\text{O}$ , (e) 1wt%  $\text{NH}_4\text{F}$  and 3wt%  $\text{H}_2\text{O}$ , (f) 2wt%  $\text{NH}_4\text{F}$  and 2wt%  $\text{H}_2\text{O}$ , (g) 2wt%  $\text{NH}_4\text{F}$  and 4wt%  $\text{H}_2\text{O}$ .

### Effect of Anodization Time:

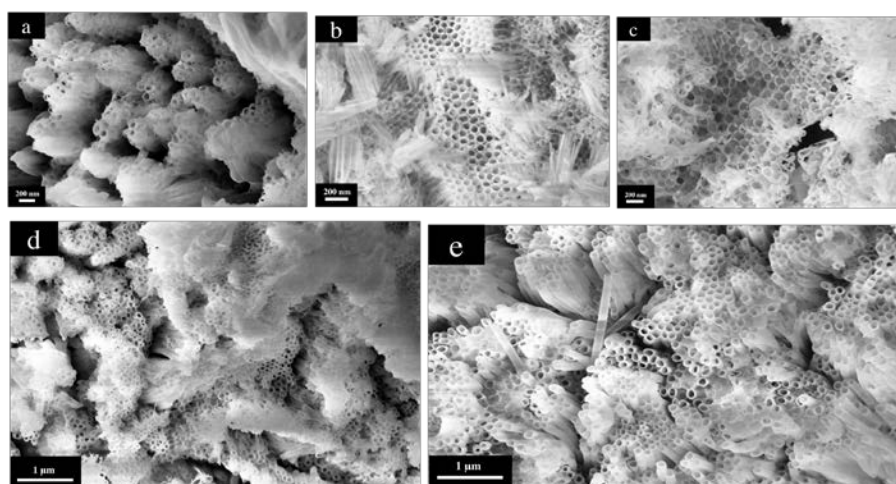

**Figure S3.** FESEM images of as-grown  $\text{ZrO}_2$  nanotube arrays via anodic oxidation @50V in glycerol electrolytes containing 20% FA, 4wt%  $\text{H}_2\text{O}$  and 1wt%  $\text{NH}_4\text{F}$ , for a duration of (a) 1hr, (b) 2hrs, (c) 5hs, (d) 6hrs, and (e) 16hrs.

### **Effect of Applied Anodization Voltage:**

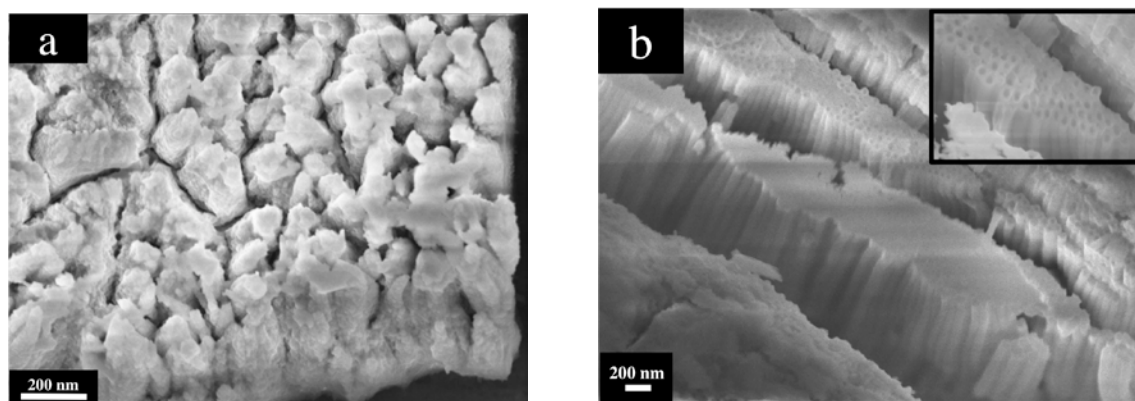

**Figure S4.** FESEM images of as-grown ZrO<sub>2</sub> nanotube arrays via anodic oxidation for 3hrs in glycerol electrolytes containing 20% FA, 4wt% H<sub>2</sub>O and 1wt%NH<sub>4</sub>F, (a) @10V and (b) @30V.

**Table S1.** ZrO<sub>2</sub> nanotube lengths, diameters, and wall thicknesses with varying FA contents in electrolytes.

| Percent Formamide | Tube Diameter (nm) | Wall Thickness (nm) | Tube Length (μm) |
|-------------------|--------------------|---------------------|------------------|
| 0%                | 30                 | 5                   | 6.4              |
| 10%               | 74                 | 7.8                 | 10               |
| 20%               | 82                 | 11.5                | 24.8             |
| 30%               | 80                 | 14                  | 48               |
| 40%               | 80                 | 13                  | 48               |

**Table S2.** Variation of ZrO<sub>2</sub> nanotube lengths (μm) with varying NH<sub>4</sub>F and H<sub>2</sub>O weight content in electrolytes.

|                       | 0.5wt% NH <sub>4</sub> F | 1wt% NH <sub>4</sub> F | 2 wt% NH <sub>4</sub> F |
|-----------------------|--------------------------|------------------------|-------------------------|
| 2wt% H <sub>2</sub> O | 20.4                     | 15                     | 11.1                    |
| 3wt% H <sub>2</sub> O | 30                       | 23                     | 18                      |
| 4wt% H <sub>2</sub> O | 35                       | 24.8                   | 20                      |
